# Supplementary material for: Prophylactic Administration of a Bacteriophage Cocktail Is Safe and Effective in Reducing Salmonella enterica Serovar Typhimurium Burden in Vivo
Source: PubMed Central journal article supplement (PMC8552648; doi:10.1128/spectrum.00497-21), 2021-08-25
Supplement: spectrum00497-21_supp_5_seq12.pdf [file spectrum00497-21_supp_5_seq12.pdf]

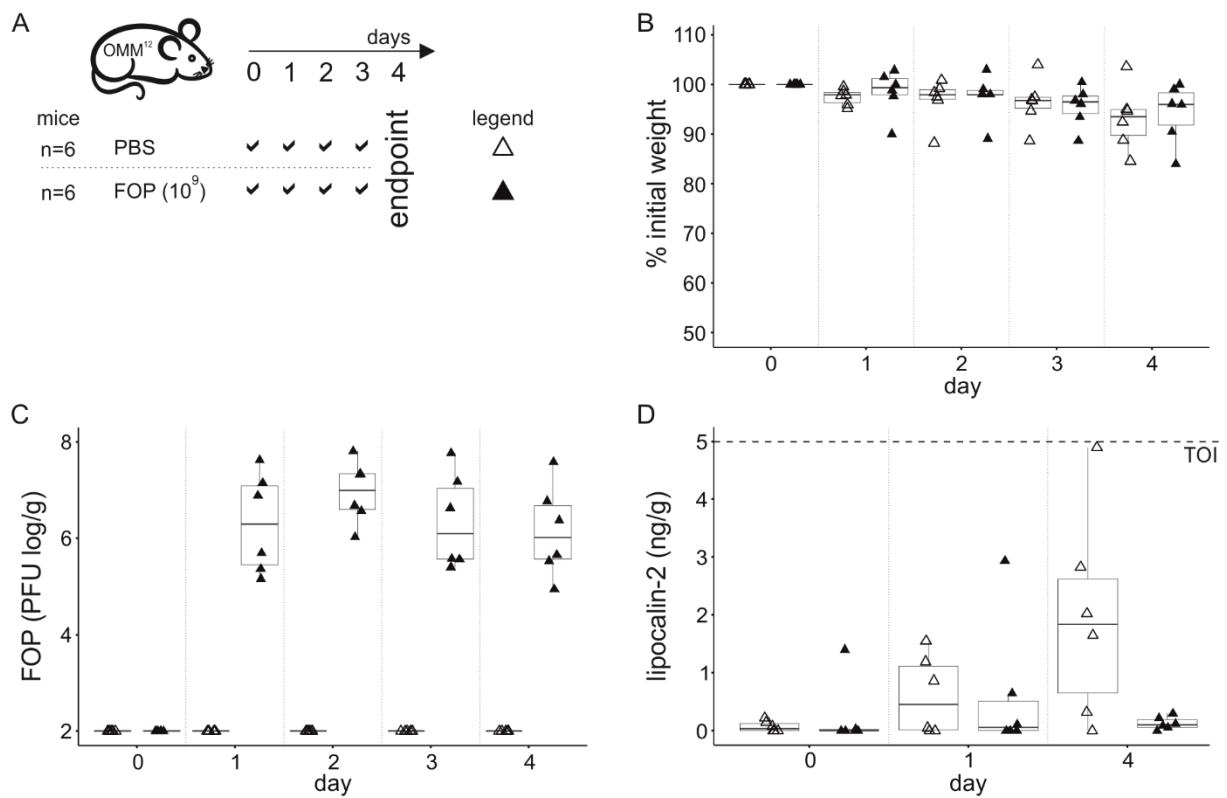

**Figure S1. Repeated administration of FOP to OMM<sup>12</sup> mice is safe**

**A.** Experimental design. OMM<sup>12</sup> mice (n = 6) were orally administered FOP (10<sup>9</sup> PFU), black triangles) or PBS (white triangles) on the indicated days. **B.** Mice were weighed daily. Shown is the percentage of weight loss compared to starting weight of OMM<sup>12</sup> mice over time. **C.** The amount of phage in OMM<sup>12</sup> mice feces were quantitated daily. Shown are the PFU counts in OMM<sup>12</sup> mice that received the indicated doses of FOP. **D.** Fecal lipocalin-2 was quantitated (ng/g) over time. The horizontal dash line represents the threshold of inflammation (TOI) as defined in (26).
